# Supplementary material for: A fingerprint of 2-[18F]FDG radiometabolites – How tissue-specific metabolism beyond 2-[18F]FDG-6-P could affect tracer accumulation
Source: PubMed Central journal article supplement (PMC10585399; doi:10.1016/j.isci.2023.108137), 2023-10-06
Supplement: mmc1.pdf [file mmc1.pdf]

## Supplemental information

### **A fingerprint of 2-[<sup>18</sup>F]FDG radiometabolites – How tissue-specific metabolism beyond 2-[<sup>18</sup>F]FDG-6-P could affect tracer accumulation**

**Eva-Maria Patronas, Theresa Balber, Anne Miller, Barbara Katharina Geist, Antje Michligk, Chrysoula Vraka, Maximilian Krisch, Nataliya Rohr-Udilova, Arvand Haschemi, Helmut Viernstein, Marcus Hacker, and Markus Mitterhauser**

## Supplemental information

| Time (min) | % A<br>(0.6 M sodium dihydrogen phosphate buffer with 3 % methanol) | % B<br>(3 % methanol in water) |
|------------|---------------------------------------------------------------------|--------------------------------|
| 0 - 12     | 5                                                                   | 95                             |
| 13         | 10                                                                  | 90                             |
| 14 - 18    | 15                                                                  | 85                             |
| 19 - 32    | 50                                                                  | 50                             |
| 34 - 35    | 5                                                                   | 95                             |

**Table S1. Gradient profile of the HPLC runs, related to Figure 1.**

| Gene                                       | H6PD                                                  | G6PD               |
|--------------------------------------------|-------------------------------------------------------|--------------------|
| <b>Unweighted_meta-Z_of_all_cancers</b>    | <b>-3.028058243</b>                                   | <b>5.104754536</b> |
| Adrenocortical_cancer                      | -0.224                                                | -1.307             |
| Bladder_cancer                             | -1.095                                                | 1.584              |
| Brain_cancer_Astrocytoma                   | 2.315                                                 | 1.174              |
| Brain_cancer_Glioblastoma                  | -0.836                                                | 0.638              |
| Brain_cancer_Glioma                        | 1.687                                                 | 2.104              |
| Brain_cancer_Medulloblastoma               | 0                                                     | 0                  |
| Brain_cancer_Meningioma                    | -0.92                                                 | 0.81               |
| Brain_cancer_Neuroblastoma                 | -4.873                                                | 7.427              |
| Breast_cancer                              | -5.307                                                | 4.185              |
| Colon_cancer                               | -0.265                                                | -0.594             |
| Gastric_cancer                             | -0.638                                                | 1.069              |
| Germ_cell_tumors                           | 0.531                                                 | -1.269             |
| Head_and_neck_cancer                       | 0.27                                                  | 0.841              |
| Head_and_neck_cancer_Hypopharyngeal_cancer | -0.123                                                | 0                  |
| Head_and_neck_cancer_Oesophageal_cancer    | -0.548                                                | 0                  |
| Head_and_neck_cancer_Oral_SCC              | 0.848                                                 | 0.205              |
| Hematopoietic_cancer_AML                   | -1.654                                                | 1.814              |
| Hematopoietic_cancer_B_ALL                 | -0.273                                                | 0.442              |
| Hematopoietic_cancer_Burkitt_lymphoma      | 0.668                                                 | -0.29              |
| Hematopoietic_cancer_CLL                   | 0.072                                                 | 1.544              |
| Hematopoietic_cancer_DLBCL                 | 0.477                                                 | 0.603              |
| Hematopoietic_cancer_FL                    | -2.66                                                 | 1.595              |
| Hematopoietic_cancer_Mantle_cell_lymphoma  | 0.771                                                 | 2.301              |
| Hematopoietic_cancer_Multiple_myeloma      | -0.103                                                | 2.832              |
| Kidney_cancer                              | -0.209                                                | 0                  |
| Liver_cancer                               | -1.438                                                | -0.824             |
| Liver_cancer_Primary                       | -0.049                                                | -0.255             |
| Lung_cancer_ADENO                          | -0.861                                                | 2.156              |
| Lung_cancer_LCC                            | -0.319                                                | 0.343              |
| Lung_cancer_SCC                            | -1.922                                                | 1.712              |
| Lung_cancer_SCLC                           | 0.258                                                 | 0                  |
| Melanoma                                   | 1.114                                                 | 0.319              |
| Melanoma_Metastasis                        | 1.127                                                 | 1.193              |
| Mesothelioma                               | -0.479                                                | 0                  |
| Ovarian_cancer                             | -0.992                                                | -1.996             |
| Pancreatic_cancer                          | -1.207                                                | 0.693              |
| Prostate_cancer                            | -1.005                                                | -0.014             |
| Sarcoma_Ewing_sarcoma                      | -0.375                                                | 0.446              |
| Sarcoma_Osteosarcoma                       | -0.674                                                | 0.397              |
|                                            | higher expression is associated with longer survival  |                    |
|                                            | higher expression is associated with shorter survival |                    |

Source: PRECOG database Stanford 2021

**Table S2. Relationship between G6PD/H6PD gene expression and survival across different cancer types, related to Figure 5.**

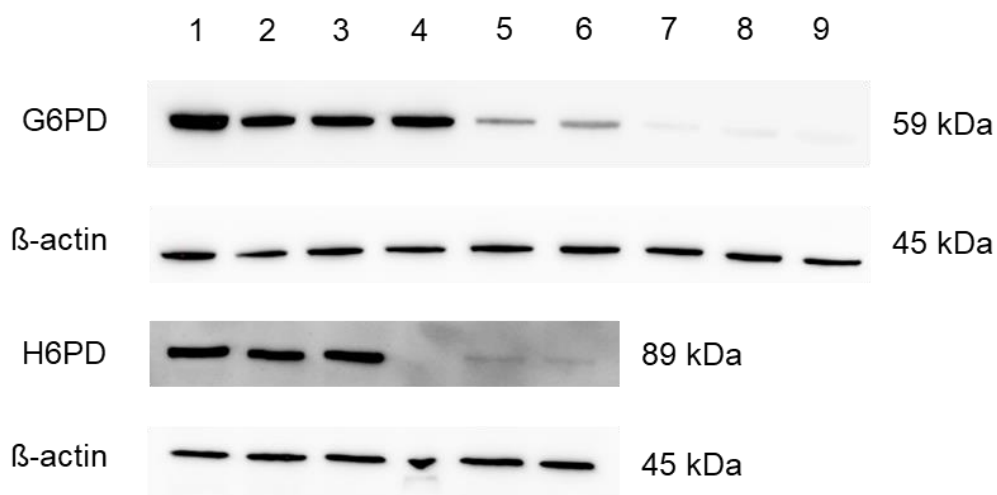

**Amount of siRNA applied and time course of silencing:**

**G6PD**

1: control  
 2: 12.5 nM, 24 h  
 3: 25 nM, 24 h  
 4: 50 nM, 24 h  
 5: 12.5 nM, 48 h

**H6PD**

1-3: control  
 4-6: 12.5 nM, 72 h

6: 50 nM, 48 h  
 7: 12.5 nM, 72 h  
 8: 25 nM, 72 h  
 9: 50 nM, 72 h

**Figure S1. Western blots of preliminary tests with SMARTpool ON-TARGETplus siRNAs to find the optimal concentration for G6PD/H6PD knockdown in HT29 cells, related to Figure 7.**

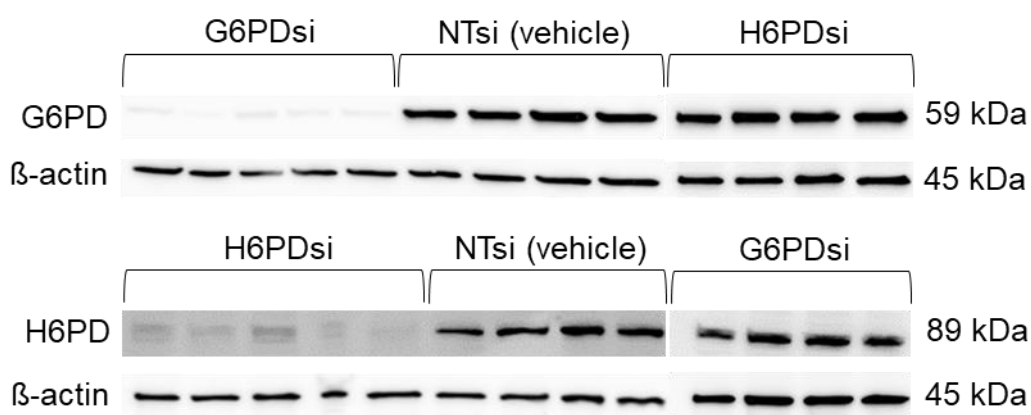

**Figure S2. Representative western blots that exclude compensatory overexpression of the respective other enzyme after knockdown with siRNA (samples from different experiments), related to Figure 7.**

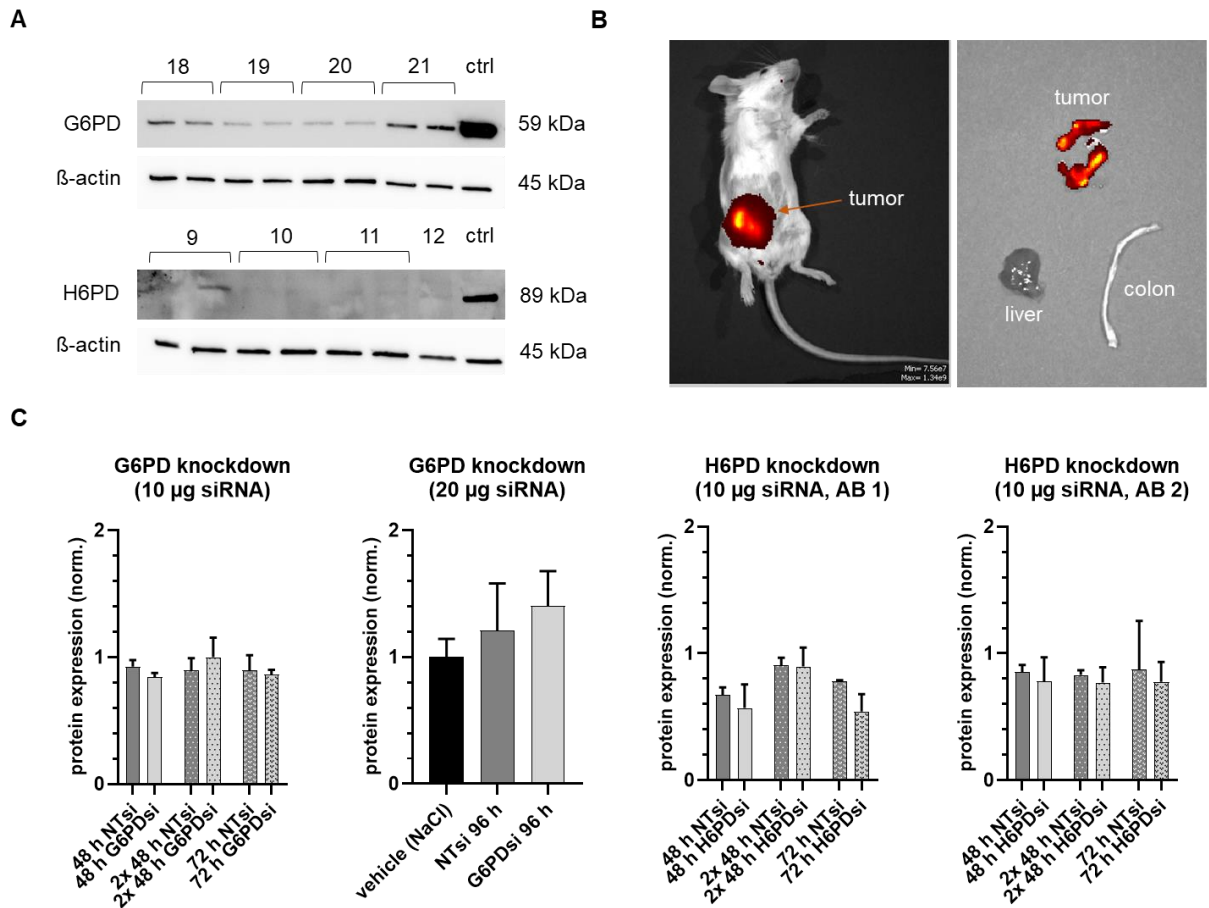

**Figure S3. Attempts for *in vivo* knockdown of G6PD/H6PD were not successful, related to Figure 7.** (A) Western blot analysis determining the most effective siRNAs within the tested pool. (B) Post-mortem IVIS® images showing successful siRNA injection and good distribution in HT29 tumor, and (C) summary of western blot analyses of G6PD/H6PD knockdown ( $n = 3$  each, NTsi = non-targeting siRNA, AB 1 = proteintech antibody, AB 2 = abcam antibody). Bar graph data are represented as mean  $\pm$  SD.
